# Supplementary material
Source: PubMed Central journal article supplement (PMC6116135)
Supplement: Supplementary_Tables.pdf [file Supplementary_Tables.pdf]

**Supplementary Table 1.** Multiple comparisons of baseline characteristics, results of endovascular recanalization therapy between the groups with different etiology to identify the source of the differences in three group comparison using Kruskal-Wallis H test.

|                                                        | CRS<br>(n=19) | LAA<br>(n=105) | <i>P</i> | CRS (n=19)   | CE (n=205)   | <i>P</i> | LAA (n=105)  | CE (n=205)   | <i>P</i> |
|--------------------------------------------------------|---------------|----------------|----------|--------------|--------------|----------|--------------|--------------|----------|
| Age, years, median [IQR]                               | 69 [58-75]    | 69 [64-76]     | 0.670    | 69 [58-75]   | 73 [65-79]   | 0.064    | 69 [64-76]   | 73 [65-79]   | 0.002    |
| Male, n (%)                                            | 9 (47)        | 76 (72)        | 0.031    | 9 (47)       | 96 (47)      | 0.964    | 76 (72)      | 96 (47)      | <0.001   |
| Initial NIHSS, median [IQR]                            | 16 [6-20]     | 12 [7-17]      | 0.481    | 16 [6-20]    | 15 [10-20]   | 0.400    | 12 [7-17]    | 15 [10-20]   | <0.001   |
| <b>Risk factors, n (%)</b>                             |               |                |          |              |              |          |              |              |          |
| Hypertension                                           | 9 (47)        | 81 (77)        | 0.007    | 9 (47)       | 123 (60)     | 0.284    | 81 (77)      | 123 (60)     | 0.003    |
| Atrial fibrillation                                    | 0             | 2 (1.9)        | 1.000    | 0            | 182 (89)     | <0.001   | 2 (1.9)      | 182 (89)     | <0.001   |
| Current smoking                                        | 5 (26)        | 35 (33)        | 0.606    | 5 (26)       | 25 (12)      | 0.148    | 35 (33)      | 25 (12)      | <0.001   |
| <b>Time from LNT to hospital arrival, median [IQR]</b> |               |                |          |              |              |          |              |              |          |
|                                                        | 211 [59-420]  | 286 [90-654]   | 0.305    | 211 [59-420] | 111 [55-339] | 0.360    | 286 [90-654] | 111 [55-339] | <0.001   |
| Use of IV fibrinolytics, n (%)                         | 3 (17)        | 40 (38)        | 0.109    | 3 (17)       | 114 (56)     | 0.002    | 40 (38)      | 114 (56)     | 0.004    |
| <b>ERT strategies, n (%)</b>                           |               |                |          |              |              |          |              |              |          |
| IA fibrinolysis                                        | 4 (21)        | 57 (54)        | 0.011    | 4 (21)       | 58 (28)      | 0.601    | 57 (54)      | 58 (28)      | <0.001   |
| Rescue techniques                                      | 1 (5.3)       | 24 (23)        | 0.118    | 1 (5.3)      | 23 (11)      | 0.701    | 24 (23)      | 23 (11)      | 0.007    |

|                                       |                |                |                  |                |                 |                  |                |                 |              |
|---------------------------------------|----------------|----------------|------------------|----------------|-----------------|------------------|----------------|-----------------|--------------|
| <b>except<br/>fibrinolysis</b>        |                |                |                  |                |                 |                  |                |                 |              |
| <b>TICI 2b or 3, n<br/>(%)</b>        | <b>12 (63)</b> | <b>88 (84)</b> | <b>0.036</b>     | <b>12 (63)</b> | <b>173 (84)</b> | <b>0.020</b>     | <b>88 (84)</b> | <b>173 (84)</b> | <b>0.894</b> |
| <b>Death at<br/>discharge, n (%)</b>  | <b>3 (16)</b>  | <b>2 (1.9)</b> | <b>0.026</b>     | <b>3 (16)</b>  | <b>14 (6.8)</b> | <b>0.164</b>     | <b>2 (1.9)</b> | <b>14 (6.8)</b> | <b>0.066</b> |
| <b>mRS 0-2 at 3<br/>months, n (%)</b> | <b>3 (16)</b>  | <b>54 (54)</b> | <b>0.016</b>     | <b>3 (16)</b>  | <b>81 (44)</b>  | <b>0.046</b>     | <b>54 (54)</b> | <b>81 (44)</b>  | <b>0.117</b> |
| <b>Death at 3<br/>months, n (%)</b>   | <b>12 (63)</b> | <b>4 (4.0)</b> | <b>&lt;0.001</b> | <b>12 (63)</b> | <b>23 (13)</b>  | <b>&lt;0.001</b> | <b>4 (4.0)</b> | <b>23 (13)</b>  | <b>0.019</b> |

A Mann-Whitney U test for continuous variables and a  $\chi^2$  test or a Fisher's exact test for categorical variables were used. The baseline characteristics that showed a significant differences in the Kruskal-Wallis  $H$  test were highlighted by using bold.

**Supplementary Table 2.** Detailed occlusion sites in the anterior circulation of the enrolled participants grouped by stroke etiologies.

|                | CRS (n=19) | LAA (n=88) | CE (n=184) |
|----------------|------------|------------|------------|
| ICA†, n (%)    |            |            |            |
| T type         | 3 (16)     | 6 (6.8)    | 45 (25)    |
| L type         | 1 (5.3)    | 7 (7.9)    | 11 (6.0)   |
| I type         | 0          | 13 (15)    | 7 (3.8)    |
| MCA‡, n (%)    |            |            |            |
| M1             | 8 (42)     | 43 (49)    | 80 (43)    |
| M2             | 7 (37)     | 17 (19)    | 38 (21)    |
| Missing, n (%) | 0          | 2 (2.3)    | 3 (1.6)    |

Abbreviations: ICA, internal carotid artery; MCA, middle cerebral artery

†The ICA occlusion were categorized as an I, L or T type lesion, based on functional nature of collateral flow patterns on angiography. If the ipsilateral anterior cerebral artery territory was filled by collateral flow from contralateral ICA, it was defined as L type occlusion; and if the ipsilateral ACA flow was also compromised, it was defined as a T type occlusion. The ipsilateral ACA and MCA flow were filled by collateral flow was defined as a L type occlusion.

‡The MCA occlusion were categorized as a M1 or M2 according to the involved arterial segment.

**Supplementary Table 3.** Univariate and multivariate logistic regression analyses of independent predictors for good functional outcome at discharge and complete recanalization after endovascular recanalization therapy

|                                                                        | Dichotomized Outcome Analysis |          |                         |          | Complete recanalization of mTICI 2b or 3 |          |                         |          |
|------------------------------------------------------------------------|-------------------------------|----------|-------------------------|----------|------------------------------------------|----------|-------------------------|----------|
|                                                                        | Crude OR [95% CI]             | <i>p</i> | Adjusted OR [95% CI]    | <i>p</i> | Crude OR [95% CI]                        | <i>p</i> | Adjusted OR [95% CI]    | <i>p</i> |
| Age, year                                                              | 0.948<br>[0.927-0.969]        | 0.000    | 0.979<br>[0.951-1.009]  | 0.172    | 0.979<br>[0.953-1.001]                   | 0.124    | 0.981<br>[0.953-1.010]  | 0.205    |
| Male gender                                                            | 2.043<br>[1.289-3.238]        | 0.002    | 0.982<br>[0.508-1.898]  | 0.957    | 1.805<br>[1.009-3.227]                   | 0.046    | 1.333<br>[0.704-2.524]  | 0.377    |
| Medical history                                                        |                               |          |                         |          |                                          |          |                         |          |
| Atrial fibrillation                                                    | 0.653<br>[0.427-1.024]        | 0.063    |                         |          | 1.291<br>[0.725-2.298]                   | 0.386    |                         |          |
| Hypertension                                                           | 0.578<br>[0.364-0.919]        | 0.020    | 0.695<br>[0.361-1.341]  | 0.277    | 0.619<br>[0.326-1.175]                   | 0.143    |                         |          |
| Diabetes mellitus                                                      | 0.733<br>[0.443-1.212]        | 0.226    |                         |          | 1.420<br>[0.725-2.781]                   | 0.306    |                         |          |
| Hyperlipidemia                                                         | 1.295<br>[0.746-2.247]        | 0.358    |                         |          | 1.583<br>[0.709-3.536]                   | 0.262    |                         |          |
| Coronary artery disease                                                | 0.547<br>[0.271-1.104]        | 0.092    |                         |          | 1.751<br>[0.659-4.656]                   | 0.261    |                         |          |
| Previous stroke                                                        | 0.574<br>[0.316-1.044]        | 0.069    |                         |          | 0.598<br>[0.307-1.165]                   | 0.131    |                         |          |
| Current smoking                                                        | 4.163<br>[2.337-7.418]        | 0.000    | 3.832<br>[1.655-8.875]  | 0.002    | 3.741<br>[1.301-10.755]                  | 0.014    | 3.492<br>[1.130-10.795] | 0.030    |
| Stroke informations                                                    |                               |          |                         |          |                                          |          |                         |          |
| Stroke subtypes                                                        |                               |          |                         |          |                                          |          |                         |          |
| Cardioembolism                                                         | Reference                     |          | Reference               |          | Reference                                |          | Reference               |          |
| Large artery atherosclerosis                                           | 1.556<br>[0.961-2.519]        | 0.072    | 1.125<br>[0.553-2.289]  | 0.745    | 0.957<br>[0.504-1.819]                   | 0.894    | 0.685<br>[0.344-1.361]  | 0.280    |
| Cancer related stroke                                                  | 1.101<br>[0.415-2.921]        | 0.847    | 0.839<br>[0.189-3.734]  | 0.819    | 0.317<br>[0.116-0.867]                   | 0.000    | 0.238<br>[0.082-0.692]  | 0.008    |
| Baseline NIHSS, per 1 point increase                                   | 0.828<br>[0.791-0.867]        | 0.000    | 0.809<br>[0.765-0.857]  | 0.000    | 0.985<br>[0.946-1.026]                   | 0.465    |                         |          |
| Clear onset                                                            | 1.289<br>[0.789-2.108]        | 0.311    |                         |          | 1.340<br>[0.731-2.456]                   | 0.343    |                         |          |
| Time from stroke onset or LNT to hospital arrival, per 1 hour increase | 0.999<br>[0.998-0.9999]       | 0.024    | 0.999<br>[0.998-0.9999] | 0.042    | 0.9997<br>[0.9992-1.0001]                | 0.243    |                         |          |

|                                                                 |                        |       |                        |       |
|-----------------------------------------------------------------|------------------------|-------|------------------------|-------|
| Time from groin puncture to recanalization, per 1 hour increase | 0.988<br>[0.987-0.995] | 0.001 | 0.985<br>[0.975-0.995] | 0.004 |
| IV tPA, N (%)                                                   | 1.467<br>[0.937-2.296] | 0.094 | 1.763<br>[0.969-3.207] | 0.063 |

---

Abbreviations: OR, Odds ratio; CI, confidence interval; IV, intravenous; NIHSS, National Institutes of Health

Stroke Scale; TICI, treatment in cerebral infarction; LNT, last normal time
